# Supplementary material for: Clinical Characteristics and Genetic Variants of a Large Cohort of Patients with Retinitis Pigmentosa Using Multimodal Imaging and Next Generation Sequencing
Source: MDPI journal article supplement (doi:10.3390/ijms241310895), 2023-06-30
Supplement: s1 [file s1]

| Patient # | Gene    | Clinical Phenotype               | Age at RP symptom onset or diagnosis if known** | Age at which genetic testing was performed | Zygosity               | Transcript     | Variant(s)                                | Variant classification per reporting laboratory (ACMG variant classification criteria applied) |                                                                            |                                                           |
|-----------|---------|----------------------------------|-------------------------------------------------|--------------------------------------------|------------------------|----------------|-------------------------------------------|------------------------------------------------------------------------------------------------|----------------------------------------------------------------------------|-----------------------------------------------------------|
| 218       | ADGRV1  | Usher syndrome                   | 23                                              | 23                                         | compound heterozygous* | NM_032119.3    | c.956dup p.(Asn319Lysfs*6)                | c.10940del p.(Asn3647Metfs*27)                                                                 | Pathogenic; Likely Pathogenic                                              |                                                           |
| 100       | AHI1    | non-syndromic RP                 | 7                                               | 39                                         | compound heterozygous  | NM_017651.4    | c.1166C>G p.(Ser389*)                     | c.2582G>A p.(Gly861Glu)                                                                        | Pathogenic; Likely Pathogenic                                              |                                                           |
| 42        | BB51    | Bardet-Biedl syndrome            | 9                                               | 10                                         | compound heterozygous  | NM_024649.4    | c.952G>A p.(Gly318Arg)                    | c.1169T>G p.(Met390Arg)                                                                        | Likely Pathogenic; Pathogenic                                              |                                                           |
| 96        | BB51    | Bardet-Biedl syndrome            | 11                                              | 11                                         | compound heterozygous  | NM_024649.4    | c.1169T>G p.(Met390Arg)                   | c.1100T>A p.(Ile367Asn)                                                                        | Pathogenic; Likely Pathogenic                                              |                                                           |
| 159       | BB51    | Bardet-Biedl syndrome            | 12                                              | 13                                         | homozygous             | NM_024649.4    | c.1169T>G p.(Met390Arg)                   |                                                                                                | Pathogenic                                                                 |                                                           |
| 9         | BB52**  | Bardet-Biedl syndrome            | 5                                               | 2                                          | compound heterozygous  | NM_031885.5    | c.72C>G p.(Tyr24*)                        |                                                                                                | Pathogenic; Pathogenic                                                     |                                                           |
| 157       | CDHR1   | non-syndromic RP                 | 18                                              | 26                                         | homozygous             | NM_033100.3    | c.1485+2T>G p.(?)                         |                                                                                                | Pathogenic                                                                 |                                                           |
| 67        | CERKL   | non-syndromic RP                 | <32                                             | 37                                         | compound heterozygous* | NM_001030311.2 | c.375C>G p.(Cys125Trp)                    | c.193G>T p.(Glu65*)                                                                            | Pathogenic; Pathogenic                                                     |                                                           |
| 86        | CERKL   | non-syndromic RP                 | <30                                             | 30                                         | compound heterozygous* | NM_001030311.2 | c.193G>T p.(Glu65*)                       | c.375C>G p.(Cys125Trp)                                                                         | Pathogenic; Likely Pathogenic                                              |                                                           |
| 80        | CLN3    | neural ceroid lipofuscinosis typ | 18                                              | 18                                         | homozygous             | NM_001042432.1 | c.125+1G>C p.(?)                          |                                                                                                | Pathogenic                                                                 |                                                           |
| 47        | CLRN1   | Usher syndrome                   | 5                                               | 26                                         | homozygous             | NM_174878.2    | c.149_152delinsTGTCACAT p.(Ser50Leufs*12) |                                                                                                | Pathogenic                                                                 |                                                           |
| 54        | CNGA1   | non-syndromic RP                 | <29                                             | 29                                         | compound heterozygous  | NM_000087.3    | c.117C>A p.(Cys39*)                       | c.1547T>G p.(Met516Arg)                                                                        | Pathogenic; Variant of uncertain significance                              |                                                           |
| 114       | EYS     | non-syndromic RP                 | 36                                              | 45                                         | compound heterozygous* | NM_001142800.1 | c.6269G>A p.(Trp2090*)                    | c.6714delT p.(Ile239Serfs*17)                                                                  | Pathogenic; Pathogenic                                                     |                                                           |
| 146       | EYS     | non-syndromic RP                 | 52                                              | 60                                         | compound heterozygous* | NM_001142800.1 | c.9036del p.(Leu3013Serfs*6)              | c.8255_8260del p.(Leu2754_Asn2754delinsTyr)                                                    | Pathogenic; Variant of uncertain significance                              |                                                           |
| 171       | EYS     | non-syndromic RP                 | 26                                              | 64                                         | compound heterozygous* | NM_001142800.1 | c.32dup p.(Met12Aspfs*14)                 | c.4350_4356del p.(Ile145Profs*3)                                                               | Pathogenic; Pathogenic                                                     |                                                           |
| 222       | EYS     | non-syndromic RP                 | 19                                              | 59                                         | compound heterozygous* | NM_001142800.1 | c.1155T>A p.(Cys385*)                     | c.(6424+1_6425-1_6725+1_6726-1)del p.(Asp2142Alafs*14)                                         | Pathogenic; Pathogenic                                                     |                                                           |
| 122       | FSCN2   | non-syndromic RP                 | 6                                               | 14                                         | heterozygous           | NM_012418.3    | c.731C>T p.(Thr244Met)                    |                                                                                                | Variant of uncertain significance                                          |                                                           |
| 27        | GUCA1A  | non-syndromic RP                 | <27                                             | 27                                         | heterozygous           | NM_000409.4    | c.464A>G p.(Glu155Gly)                    |                                                                                                | Pathogenic                                                                 |                                                           |
| 87        | GUCY2D  | non-syndromic RP                 | 7                                               | 11                                         | heterozygous           | NM_000180.3    | c.2513G>A p.(Arg838His)                   |                                                                                                | Pathogenic                                                                 |                                                           |
| 172       | IDH3A   | non-syndromic RP                 | 7                                               | 45                                         | compound heterozygous* | NM_005530.2    | c.946C>T p.(Arg316Cys)                    | c.533G>A p.(Arg178His)                                                                         | Likely pathogenic; Variant of uncertain significance                       |                                                           |
| 153       | IMP2    | non-syndromic RP                 | 13                                              | 23                                         | compound heterozygous* | NM_016247.4    | c.3262C>T p.(Arg108*)                     | c.1263G>A p.(Trp421*)                                                                          | Pathogenic; Likely Pathogenic                                              |                                                           |
| 174       | KLUH1   | Usher syndrome                   | 15                                              | 29                                         | heterozygous           | NM_001031710.2 | c.458C>T p.(Ala153Val)                    |                                                                                                | Pathogenic                                                                 |                                                           |
| 221       | MAV     | non-syndromic RP                 | 41                                              | 44                                         | homozygous             | NM_00124957.2  | c.911_914del p.(Asn304Serfs*6)            |                                                                                                | Pathogenic                                                                 |                                                           |
| 150       | MAP2K2  | cardiofaciocutaneous syndrome    | 17                                              | 17                                         | heterozygous           | NM_030662.4    | c.183A>C p.(Lys61Asn)                     |                                                                                                | Pathogenic                                                                 |                                                           |
| 113       | MERTK   | non-syndromic RP                 | 7                                               | 25                                         | compound heterozygous* | NM_006343.2    | c.(?_1222)_1144+1_1145-1)del              | c.2180G>A p.(Arg727Gln)                                                                        | Pathogenic; Pathogenic                                                     |                                                           |
| 134       | MFRP    | non-syndromic RP                 | 60                                              | 62                                         | compound heterozygous* | NM_031433.3    | c.734G>T p.(Gly245Val)                    | c.1124+1G>A p.(?)                                                                              | Variant of uncertain significance; Likely Pathogenic                       |                                                           |
| 110       | MYO7A   | Usher syndrome                   | 7                                               | 53                                         | compound heterozygous* | NM_000260.3    | c.5968C>T p.(Gln1990*)                    | c.4442-2A>C p.(?)                                                                              | Pathogenic; Likely Pathogenic                                              |                                                           |
| 152       | MYO7A   | Usher syndrome                   | 19                                              | 20                                         | compound heterozygous* | NM_000260.3    | c.1003+1_1003+33delinsCAGTGCCTTG p.(?)    | c.1595A>G p.(His532Arg)                                                                        | Likely pathogenic; Variant of uncertain significance                       |                                                           |
| 196       | MYO7A   | Usher syndrome                   | 3                                               | 7                                          | compound heterozygous* | NM_000260.3    | c.582delC p.(Phe195*)                     | c.5886_5888delCTT p.(Phe1963del)                                                               | Pathogenic; Pathogenic                                                     |                                                           |
| 197       | MYO7A   | Usher syndrome                   | 16                                              | 4                                          | compound heterozygous* | NM_000260.3    | c.582delC p.(Phe195*)                     | c.5886_5888delCTT p.(Phe1963del)                                                               | Pathogenic; Pathogenic                                                     |                                                           |
| 200       | MYO7A   | Usher syndrome                   | 10                                              | 65                                         | homozygous             | NM_000260.3    | c.1996C>T p.(Arg666*)                     |                                                                                                | Pathogenic                                                                 |                                                           |
| 202       | MYO7A   | Usher syndrome                   | 6                                               | 7                                          | compound heterozygous* | NM_000260.3    | c.1900C>T p.(Arg634X)                     | c.1976C>A p.(Ser659X)                                                                          | Pathogenic; Pathogenic                                                     |                                                           |
| 207       | MYO7A   | Usher syndrome                   | 8                                               | 4                                          | compound heterozygous* | NM_000260.3    | c.3476G>T p.(Gly159Val)                   | c.5392C>T p.(Gln1798*)                                                                         | Pathogenic; Pathogenic                                                     |                                                           |
| 208       | MYO7A   | Usher syndrome                   | 15                                              | 37                                         | compound heterozygous* | NM_000260.3    | c.3719G>A p.(Arg1240Gln)                  | c.2838del p.(Met946Ilefs*116)                                                                  | Pathogenic; Pathogenic                                                     |                                                           |
| 213       | MYO7A   | Usher syndrome                   | 24                                              | 41                                         | compound heterozygous* | NM_000260.3    | c.494C>T p.(Thr165Met)                    | c.1349A>T p.(Glu450Val)                                                                        | Pathogenic; Likely Pathogenic                                              |                                                           |
| 215       | MYO7A   | Usher syndrome                   | <38                                             | 49                                         | compound heterozygous* | NM_000260.3    | c.3719G>A p.(Arg1240Gln)                  | c.6439-2A>G p.(?)                                                                              | Pathogenic; Pathogenic                                                     |                                                           |
| 213       | MYO7A   | Usher syndrome                   | 14                                              | 40                                         | compound heterozygous* | NM_000260.3    | c.494C>T p.(Thr165Met)                    | c.1349A>T p.(Glu450Val)                                                                        | Pathogenic; Likely Pathogenic                                              |                                                           |
| 147       | NPH1    | nephronophthisis with RP         | 46                                              | 61                                         | homozygous             | NM_000272.3    | c.(69+1_70-1)_1*455_?)del                 |                                                                                                | Pathogenic                                                                 |                                                           |
| 31        | NR2E3   | non-syndromic RP                 | 11                                              | 53                                         | homozygous             | NM_014249.3    | c.932G>A p.(Arg311Gln)                    |                                                                                                | Pathogenic                                                                 |                                                           |
| 148       | PCARE   | non-syndromic RP                 | 66                                              | 75                                         | compound heterozygous* | NM_001029883.2 | c.2950C>T p.(Arg984*)                     | c.3521_3538del (p.Asp1174_Ala1179del)                                                          | Pathogenic; Variant of uncertain significance                              |                                                           |
| 14        | PDE6B   | non-syndromic RP                 | 16                                              | 51                                         | compound heterozygous* | NM_000283.3    | c.2193+1G>A p.(?)                         | c.1765dup p.(Ala589Glyfs*10)                                                                   | Pathogenic; Pathogenic                                                     |                                                           |
| 49        | PDE6B   | non-syndromic RP                 | 11                                              | 11                                         | compound heterozygous* | NM_000283.3    | c.1466T>C p.(Leu489Pro)                   | c.1928_1968del41 p.(Ile644fs*)                                                                 | Variant of uncertain significance ("probably damaging"); Likely Pathogenic |                                                           |
| 5         | POMGNT1 | muscular dystrophy-dystroglycan  | 40                                              | 46                                         | compound heterozygous  | NM_017739.3    | c.1539+1G>A p.(?)                         | c.1453C>T p.(Arg485Cys)                                                                        | Pathogenic; Likely Pathogenic                                              |                                                           |
| 77        | PRPF3   | non-syndromic RP                 | 10                                              | 10                                         | heterozygous           | NM_004698.2    | c.1481C>T p.(Thr9Met)                     |                                                                                                | Pathogenic                                                                 |                                                           |
| 93        | PRPF31  | non-syndromic RP                 | 23                                              | 40                                         | heterozygous           | NM_015629.3    | c.239-1G>A p.(?)                          |                                                                                                | Pathogenic                                                                 |                                                           |
| 17        | PRPF2   | non-syndromic cone-rod dystropi  | 50                                              | 61                                         | heterozygous           | NM_000322.4    | c.811_813del p.(Leu271del)                |                                                                                                | Likely Pathogenic                                                          |                                                           |
| 18        | PRPF2   | non-syndromic cone-rod dystropi  | 50                                              | 51                                         | heterozygous           | NM_000322.4    | c.811_813del p.(Leu271del)                |                                                                                                | Likely Pathogenic                                                          |                                                           |
| 20        | PRPF2   | non-syndromic cone-rod dystropi  | 43                                              | 58                                         | heterozygous           | NM_000322.4    | c.811_813del p.(Leu271del)                |                                                                                                | Likely Pathogenic                                                          |                                                           |
| 12        | RHO     | non-syndromic RP                 | 18                                              | 52                                         | heterozygous           | NM_000539.3    | c.1040C>G p.(Pro347Arg)                   |                                                                                                | Pathogenic                                                                 |                                                           |
| 89        | RHO**   | non-syndromic RP                 | 10                                              | 63                                         | heterozygous           | NM_000539.3    | c.173C>G p.(Thr58Arg)                     |                                                                                                | Pathogenic                                                                 |                                                           |
| 16        | RLBP1   | non-syndromic RP                 | 20                                              | 55                                         | homozygous             | NM_000326.4    | c.(525+1_526-1)_1*418_?)del               |                                                                                                | Pathogenic                                                                 |                                                           |
| 37        | RP1     | non-syndromic RP                 | <60                                             | 69                                         | heterozygous           | NM_006269.1    | c.2321_2322insAlu p.(Leu774fs)            |                                                                                                | Pathogenic                                                                 |                                                           |
| 56        | RP1     | non-syndromic RP                 | 23                                              | 28                                         | heterozygous           | NM_006269.1    | c.2219C>A p.(Ser740*)                     |                                                                                                | Pathogenic                                                                 |                                                           |
| 154       | RP1     | non-syndromic RP                 | 41                                              | 43                                         | heterozygous           | NM_006269.1    | c.2321_2322ins? p.(Leu774fs)              |                                                                                                | Pathogenic                                                                 |                                                           |
| 178       | RP1     | non-syndromic RP                 | <30                                             | 39                                         | homozygous             | NM_006269.1    | c.4804C>T p.(Gln1602*)                    |                                                                                                | Pathogenic                                                                 |                                                           |
| 32        | RPGR    | non-syndromic RP                 | 22                                              | 59                                         | hemizygous             | NM_001034853.1 | c.2384del p.(Glu795Glyfs*20)              |                                                                                                | Pathogenic                                                                 |                                                           |
| 36        | RPGR    | non-syndromic RP                 | 6                                               | 13                                         | hemizygous             | NM_001034853.1 | c.2568dup p.(Lys857Glufs*222)             |                                                                                                | Pathogenic                                                                 |                                                           |
| 73        | RPGR    | non-syndromic RP                 | 4                                               | 9                                          | hemizygous             | NM_001034853.1 | c.2384del p.(Glu795Glyfs*20)              |                                                                                                | Pathogenic                                                                 |                                                           |
| 128       | RPGR    | non-syndromic RP                 | <18                                             | 27                                         | hemizygous             | NM_001034853.1 | c.2405_2406del p.(Glu802Glyfs*32)         |                                                                                                | Pathogenic                                                                 |                                                           |
| 131       | RPGR    | non-syndromic RP                 | 39                                              | 39                                         | heterozygous           | NM_001034853.1 | c.2505_2506delGG p.(Glu836Argfs*242)      |                                                                                                | Pathogenic                                                                 |                                                           |
| 132       | RPGR    | non-syndromic RP                 | 8                                               | 9                                          | hemizygous             | NM_001034853.1 | c.2505_2506delGG p.(Glu836Argfs*242)      |                                                                                                | Pathogenic                                                                 |                                                           |
| 135       | RPGR    | non-syndromic RP                 | 22                                              | 51                                         | hemizygous             | NM_001034853.1 | c.2426_2427del p.(Glu809Glyfs*25)         |                                                                                                | Pathogenic                                                                 |                                                           |
| 167       | RPGR    | non-syndromic RP                 | 4                                               | 4                                          | hemizygous             | NM_001034853.1 | c.2426_2427del p.(Glu809Glyfs*25)         |                                                                                                | Pathogenic                                                                 |                                                           |
| 168       | RPGR    | non-syndromic RP                 | ently asymptomatic                              | 3                                          | hemizygous             | NM_001034853.1 | c.2426_2427del p.(Glu809Glyfs*25)         |                                                                                                | Pathogenic                                                                 |                                                           |
| 169       | RPGR    | non-syndromic RP                 | ently asymptomatic                              | 2                                          | hemizygous             | NM_001034853.1 | c.2426_2427del p.(Glu809Glyfs*25)         |                                                                                                | Pathogenic                                                                 |                                                           |
| 223       | RPGR    | non-syndromic RP                 | 14                                              | 29                                         | hemizygous             | NM_001034853.1 | c.2323_2324del p.(Arg775Gluufs*59)        |                                                                                                | Pathogenic                                                                 |                                                           |
| 156       | RPGRI1  | non-syndromic RP                 | 22                                              | 75                                         | compound heterozygous* | NM_020366.3    | c.2718dup p.(Asn907*)                     | c.(3099+1_3100-1_(3238+1_3239-1)del                                                            | Pathogenic; Pathogenic                                                     |                                                           |
| 61        | RS1     | non-syndromic RP                 | <57                                             | 57                                         | hemizygous             | NM_000330.3    | c.214G>A p.(Glu72Lys)                     |                                                                                                | Pathogenic                                                                 |                                                           |
| 8         | USH2A   | non-syndromic RP                 | <70                                             | 36                                         | compound heterozygous  | NM_020933.2    | c.2276G>T p.(Cys759Phe)                   | c.4645C>T p.(Arg1549*)                                                                         | Pathogenic; Pathogenic                                                     |                                                           |
| 46        | USH2A   | non-syndromic RP                 | <29                                             | 70                                         | compound heterozygous* | NM_020933.2    | c.7524del p.(Arg2509Glyfs*19)             | c.2276G>T p.(Cys759Phe)                                                                        | Pathogenic; Likely Pathogenic                                              |                                                           |
| 65        | USH2A   | non-syndromic RP                 | <18                                             | 57                                         | compound heterozygous* | NM_020933.2    | c.11074del p.(Ile3692Serfs*26)            | c.14203C>T p.(Pro4735Ser)                                                                      | Pathogenic; Variant of uncertain significance                              |                                                           |
| 193       | USH2A   | Usher syndrome                   | 16                                              | 22                                         | compound heterozygous* | NM_020933.2    | c.11864G>A p.(Trp3955*)                   | c.(4627+1_4628-1_(6049+1_6050-1)del                                                            | Pathogenic; Pathogenic                                                     |                                                           |
| 194       | USH2A   | Usher syndrome                   | 24                                              | 44                                         | compound heterozygous* | NM_020933.2    | c.2276G>T p.(Cys759Phe)                   | c.5506C>A p.(Pro1836Thr)                                                                       | c.13778C>T p.(Ser4593Leu)                                                  | Pathogenic; Pathogenic; Variant of uncertain significance |
| 198       | USH2A   | Usher syndrome                   | 50                                              | 61                                         | compound heterozygous  | NM_020933.2    | c.7595-3C>G p.(?)                         | c.4106C>T p.(Ser1369Leu)                                                                       | Pathogenic; Likely Pathogenic                                              |                                                           |
| 203       | USH2A   | Usher syndrome                   | 14                                              | 63                                         | compound heterozygous* | NM_020933.2    | c.9885T>G p.(Cys3295Trp)                  | c.14792-2A>G p.(?)                                                                             | Pathogenic; Pathogenic                                                     |                                                           |
| 204       | USH2A   | Usher syndrome                   | 37                                              | 72                                         | compound heterozygous* | NM_020933.2    | c.14791+2T>A p.(?)                        | c.(2809+1_2810-1_(7120+1_7121-1)dup                                                            | Pathogenic; Variant of uncertain significance                              |                                                           |
| 210       | USH2A   | non-syndromic RP                 | 64                                              | 61                                         | compound heterozygous  | NM_020933.2    | c.11864G>A p.(Trp3955*)                   | c.12268C>A p.(Pro4090Thr)                                                                      | Pathogenic; Pathogenic                                                     |                                                           |
| 211       | USH2A   | non-syndromic RP                 | 65                                              | 65                                         | compound heterozygous* | NM_020933.2    | c.2332G>T p.(Asp778Tyr)                   | c.13349C>T p.(Pro4450Leu)                                                                      | Pathogenic; Likely Pathogenic                                              |                                                           |
| 219       | USH2A   | non-syndromic RP                 | 40                                              | 40                                         | compound heterozygous* | NM_020933.2    | c.10561T>C p.(Trp3521Arg)                 | c.8981G>A p.(Trp2994*)                                                                         | Pathogenic; Pathogenic                                                     |                                                           |
| 255       | USH2A   | non-syndromic RP                 | 67                                              | 86                                         | compound heterozygous* | NM_020933.2    | c.2276G>T p.(Cys759Phe)                   | c.920_923dup p.(His308Glnfs*16)                                                                | Pathogenic; Pathogenic                                                     |                                                           |
| 33        | USH2A   | non-syndromic RP                 | 37                                              | 38                                         | compound heterozygous* | NM_020933.2    | c.2276G>T p.(Cys759Phe)                   | c.5516T>A p.(Val1839Glu)                                                                       | Pathogenic; Pathogenic                                                     |                                                           |
| 216       | USH2A** | Usher syndrome                   | 26                                              | 35                                         | homozygous             | NM_020933.2    | c.7595-2144A>G p.(?)                      |                                                                                                | Pathogenic                                                                 |                                                           |
| 25        | VPS13B  | Cohen syndrome                   | 8                                               | 16                                         | compound heterozygous  | NM_01789.03    | c.6002delC p.(Pro2001Leufs*18)            | c.11314C>T p.(Gln3772*)                                                                        | Pathogenic; Pathogenic                                                     |                                                           |
| 182       | VSP13B  | Cohen syndrome                   | 13                                              | 24                                         | compound heterozygous  | NM_01789.03    | c.6733-1G>A p.(?)                         | c.11119G>A p.(?)                                                                               | Pathogenic; Likely Pathogenic                                              |                                                           |

\* two variants presumed to be in trans (no family member testing performed to confirm and/or data not available from the lab to confirm trans configuration)

\*\*variants per clinical documentation only

\*\*age of onset or diagnosis is per chart review and patient report
